# Supplementary material for: Noncovalently bound excited-state dimers: a perspective on current time-dependent density functional theory approaches applied to aromatic excimer models
Source: Royal Society of Chemistry journal article supplement (doi:10.1039/d2ra01703b), 2022-01-01
Supplement: d2ra01703b1.pdf [file d2ra01703b1.pdf]

**Supporting Information:**

**Noncovalently bound excited-state dimers: a  
perspective on current time-dependent Density  
Functional Theory approaches applied to  
aromatic excimer models**

Amy C. Hancock and Lars Goerigk\*

*School of Chemistry, The University of Melbourne, Victoria 3010, Australia;*

*Ph: +61-(0)3-83446784*

E-mail: lars.goerigk@unimelb.edu.au

# Contents

|                                                                                                                 |             |
|-----------------------------------------------------------------------------------------------------------------|-------------|
| <b>SI.1 Explicit definition of coordinates defining inter-monomer distance</b>                                  | <b>S-3</b>  |
| <b>SI.2 Additional Data for Establishing Suitable Wavefunction Reference Method</b>                             | <b>S-3</b>  |
| SI.2.1 Numerical Data for Wavefunction Methods . . . . .                                                        | S-3         |
| SI.2.2 SCS-CC2 Dissociation Curves Comparing Basis Sets and Extrapolation to Complete Basis Set Limit . . . . . | S-4         |
| <b>SI.3 The <math>\omega</math>B97X Problem</b>                                                                 | <b>S-6</b>  |
| <b>SI.4 Additional Data For Benchmarking TD-DFT methods</b>                                                     | <b>S-7</b>  |
| SI.4.1 Fock Exchange Study . . . . .                                                                            | S-7         |
| SI.4.1.1 Tables of Minima and Signed Percentage Errors . . . . .                                                | S-7         |
| SI.4.1.2 Dissociation Curves . . . . .                                                                          | S-8         |
| SI.4.2 DFT-D Corrected TD-DFT . . . . .                                                                         | S-9         |
| SI.4.2.1 Dissociation Curves . . . . .                                                                          | S-9         |
| SI.4.2.2 Unphysical Positive Regions in Mid-range of Dissociation Curves . . . . .                              | S-11        |
| SI.4.3 Numerical Data For Binding Minima and Associated Percentage errors . . . . .                             | S-14        |
| SI.4.4 Mean Absolute Deviations . . . . .                                                                       | S-17        |
| <b>References</b>                                                                                               | <b>S-18</b> |

# SI.1 Explicit definition of coordinates defining inter-monomer distance

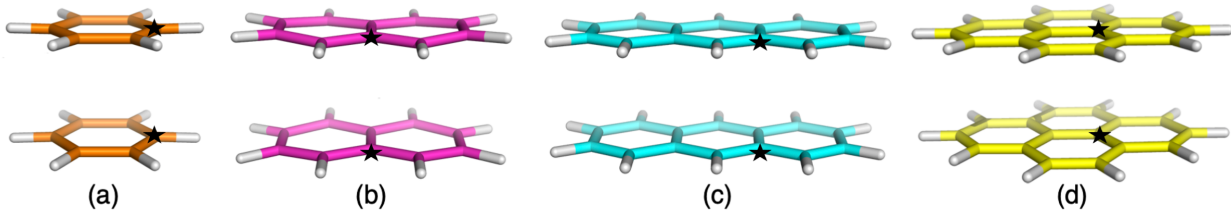

**Figure S1:** Diagrams of excimer model structures illustrating the atomic coordinates used to define the inter-monomer distance for dissociation energy curves. Z-matrix templates used for defining the inter-monomer distance from these coordinates is given in the other supplementary files. Refer to README file for usage; xyz of optimised dimers are also provided.

# SI.2 Additional Data for Establishing Suitable Wavefunction Reference Method

## SI.2.1 Numerical Data for Wavefunction Methods

**Table S1:** Explicit minima of SCS-CC2 and CC2 interaction energy curves for the basis set study. The distance of the minimum is denoted  $r_e$  (Å) and the associated interaction energy at that position  $\Delta E$  (kcal/mol).

|             | SCS-CC2 |            | CC2   |            |
|-------------|---------|------------|-------|------------|
| Basis set   | $r_e$   | $\Delta E$ | $r_e$ | $\Delta E$ |
| def2-SVP    | 2.99    | -12.60     | 2.90  | -18.22     |
| def2-TZVP   | 2.99    | -13.18     | 2.90  | -20.19     |
| def2-QZVP   | 2.99    | -13.29     | 2.90  | -20.64     |
| cc-pVTZ     | 3.00    | -12.99     | 2.90  | -19.95     |
| def2-TZVPD  | 3.00    | -15.61     | 2.90  | -22.75     |
| aug-cc-pVTZ | 3.00    | -15.03     | 2.90  | -22.37     |

**Table S2:** CCSDR(3) and SCS-CC2 interaction energies (kcal/mol) relative to the excited state asymptote (value at 16 Å) for Karlsruhe basis sets and CBS limit extrapolations.

|              | CCSDR(3) |           |          | SCS-CC2  |          |
|--------------|----------|-----------|----------|----------|----------|
| Distance (Å) | def2-SVP | def2-TZVP | CBS(2,3) | CBS(2,3) | CBS(3,4) |
| 2.90         | -10.72   | -11.31    | -13.06   | -14.56   | -13.40   |
| 2.95         | -11.19   | -11.76    | -13.41   | -14.76   | -13.63   |
| 3.00         | -11.39   | -11.96    | -13.52   | -14.73   | -13.62   |
| 3.05         | -11.36   | -11.96    | -13.42   | -14.52   | -13.42   |

## SI.2.2 SCS-CC2 Dissociation Curves Comparing Basis Sets and Extrapolation to Complete Basis Set Limit

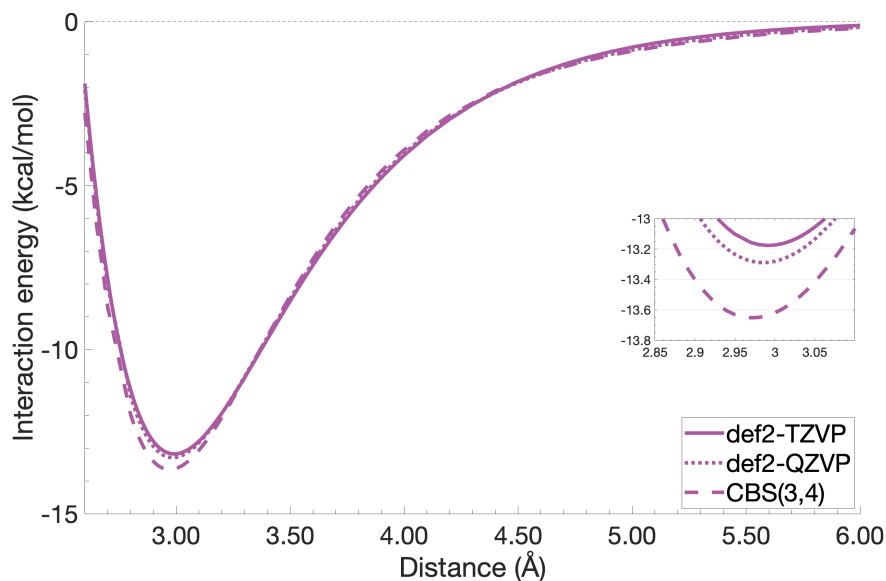

**Figure S2:** Dissociation curves for the lowest-lying excited state of the fully-stacked benzene dimer with SCS-CC2 across two successive basis sets in the Karlsruhe family (def2-nZVP) and their complete basis set extrapolated result, CBS(3,4). A magnified snapshot of the minima is shown to the right.

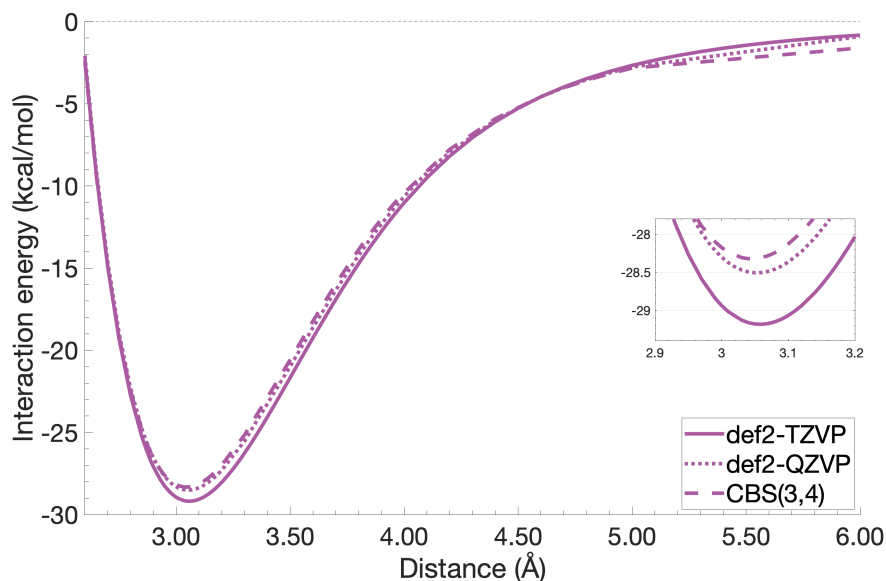

**Figure S3:** Dissociation curves for the lowest-lying excited state of the fully-stacked naphthalene dimer with spin-component scaled CC2 (SCS-CC2) across two successive basis sets in the Karlsruhe family (def2-nZVP) and their complete basis set extrapolated result, CBS(3,4). A magnified snapshot of the minima is shown to the right.

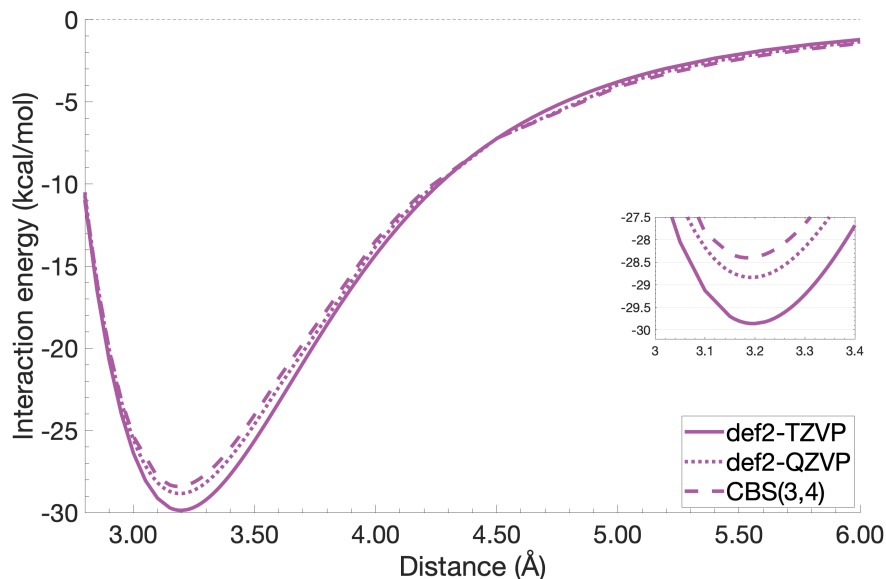

**Figure S4:** Dissociation curves for the lowest-lying excited state of the fully-stacked anthracene dimer with spin-component scaled CC2 (SCS-CC2) across two successive basis sets in the Karlsruhe family (def2-nZVP) and their complete basis set extrapolated result, CBS(3,4). A magnified snapshot of the minima is shown to the right.

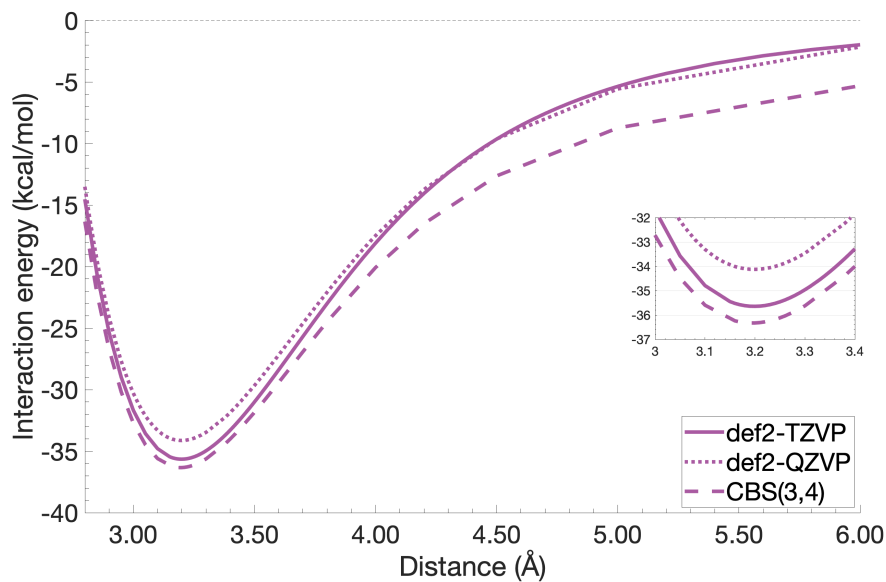

**Figure S5:** Dissociation curves for the lowest-lying excited state of the fully-stacked pyrene dimer with spin-component scaled CC2 (SCS-CC2) across two successive basis sets in the Karlsruhe family (def2-nZVP) and their complete basis set extrapolated result, CBS(3,4). A magnified snapshot of the minima is shown to the right.

## SI.3 The $\omega$ B97X Problem

There were some unanticipated technical problems for  $\omega$ B97X resulting in wobbly interaction energy curves as shown in the figures below.

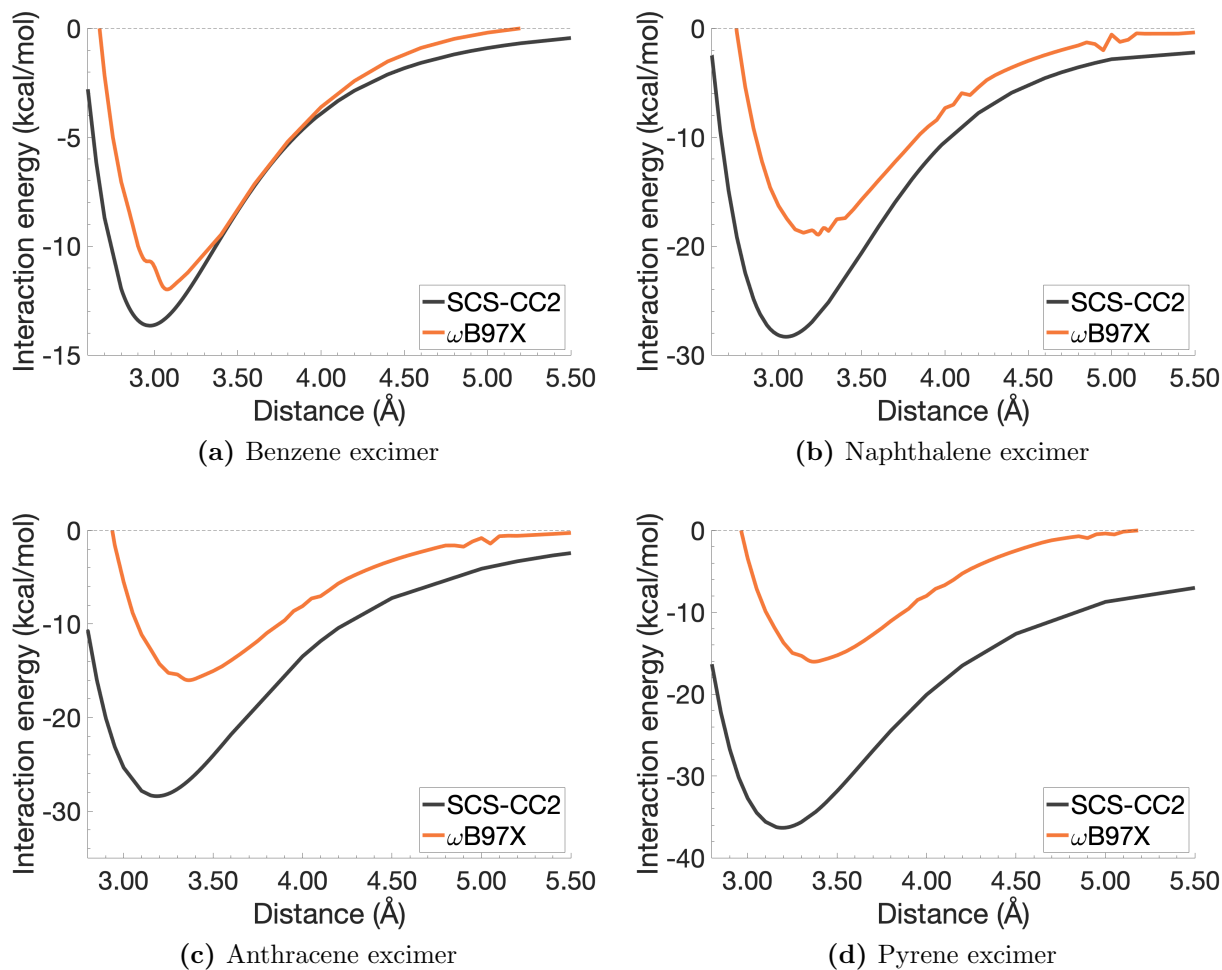

**Figure S6:** Dissociation energy curves for  $\omega$ B97X and SCS-CC2/CBS(3,4) for each excimer. Due to the difficulty of identifying the actual minima for  $\omega$ B97X we defined each  $D_e$  and  $r_e$  from the observed minimum of each curve.

# SI.4 Additional Data For Benchmarking TD-DFT methods

## SI.4.1 Fock Exchange Study

### SI.4.1.1 Tables of Minima and Signed Percentage Errors

**Table S3:** Dissociation energies ( $D_e$ ; kcal/mol), equilibrium inter-monomer distances ( $r_e$ ; Å) and signed percentage errors relative to the SCS-CC2/CBS(3,4) reference for TD-BLYP and global hybrid variants with varied amounts of Fock exchange.

| Excimer           | Benzene                | Naphthalene | Anthracene | Pyrene | Benzene                    | Naphthalene | Anthracene | Pyrene |
|-------------------|------------------------|-------------|------------|--------|----------------------------|-------------|------------|--------|
| Fock exchange (%) | $D_e$                  |             |            |        | $r_e$                      |             |            |        |
| 0                 | 10.56                  | 0.73        | -          | -      | 3.23                       | 3.57        | -          | -      |
| 20 <sup>a</sup>   | 10.68                  | 14.69       | 9.18       | 10.60  | 3.15                       | 3.37        | 3.61       | 3.67   |
| 37.5 <sup>b</sup> | 6.85                   | 9.69        | 3.77       | 4.70   | 2.95                       | 3.14        | 3.39       | 3.44   |
| 50 <sup>c</sup>   | 8.10                   | 11.79       | 6.88       | 8.22   | 3.13                       | 3.29        | 3.51       | 3.54   |
| 75 <sup>d</sup>   | 3.66                   | 1.95        | -          | -      | 2.76                       | 2.97        | -          | -      |
| Fock exchange (%) | Percent error in $D_e$ |             |            |        | Percent error in $r_e$ (%) |             |            |        |
| 0 <sup>a</sup>    | -22.7                  | -97.4       | -          | -      | 8.8                        | 17.4        | -          | -      |
| 20 <sup>a</sup>   | -21.7                  | -48.1       | -67.7      | -70.8  | 6.1                        | 10.9        | 13.5       | 15.0   |
| 37.5 <sup>b</sup> | -49.8                  | -65.8       | -86.7      | -87.1  | -0.7                       | 3.3         | 6.6        | 7.8    |
| 50 <sup>c</sup>   | -40.7                  | -58.4       | -75.8      | -77.4  | 5.4                        | 8.2         | 10.4       | 11.0   |
| 75 <sup>d</sup>   | -73.2                  | -93.1       | -          | -      | -7.1                       | -2.3        | -          | -      |

<sup>a</sup> B3LYP functional. <sup>b</sup> Dubbed “B38LYP” functional in Fig. S7. <sup>c</sup> BHLYP functional. <sup>d</sup> BLYP(75) do not predict minima for the anthracene and pyrene excimer states; see Fig. S7.

**Table S4:** Dissociation energies ( $D_e$ ), equilibrium inter-monomer distances ( $r_e$ ) and signed percentage errors relative to the SCS-CC2/CBS(3,4) reference for TD-PBE and global hybrid variants with varied amounts of Fock exchange.

| Excimer           | Benzene            | Naphthalene | Anthracene | Pyrene | Benzene            | Naphthalene | Anthracene | Pyrene |
|-------------------|--------------------|-------------|------------|--------|--------------------|-------------|------------|--------|
| Fock exchange (%) | $D_e$ (kcal/mol)   |             |            |        | $r_e$ (Å)          |             |            |        |
| 0                 | 8.46               | 5.42        | 3.23       | 1.76   | 3.13               | 3.36        | 3.60       | 3.71   |
| 20                | 14.12              | 18.26       | 12.24      | 13.75  | 2.95               | 3.15        | 3.38       | 3.44   |
| 37.5 <sup>a</sup> | 5.69               | 15.30       | 9.04       | 10.24  | 3.17               | 3.03        | 3.26       | 3.30   |
| 50                | 10.19              | 12.90       | 6.59       | 7.13   | 2.78               | 2.96        | 3.19       | 3.23   |
| 75                | 7.95               | 7.16        | 1.29       | 0.91   | 2.67               | 2.86        | 3.14       | 3.23   |
| Fock exchange (%) | Error in $D_e$ (%) |             |            |        | Error in $r_e$ (%) |             |            |        |
| 0                 | -38.0              | -80.9       | -88.6      | -95.1  | 5.4                | 10.5        | 13.2       | 16.3   |
| 20                | 3.4                | -35.5       | -56.9      | -62.1  | -0.7               | 3.6         | 6.3        | 7.8    |
| 37.5 <sup>a</sup> | -58.3              | -46.0       | -68.2      | -71.8  | 6.7                | -0.3        | 2.5        | 3.4    |
| 50                | -25.4              | -54.4       | -76.8      | -80.4  | -6.4               | -2.6        | 0.3        | 1.3    |
| 75                | -41.7              | -74.7       | -95.5      | -97.5  | -10.1              | -5.9        | -1.3       | 1.3    |

<sup>a</sup> PBE38 functional.

### SI.4.1.2 Dissociation Curves

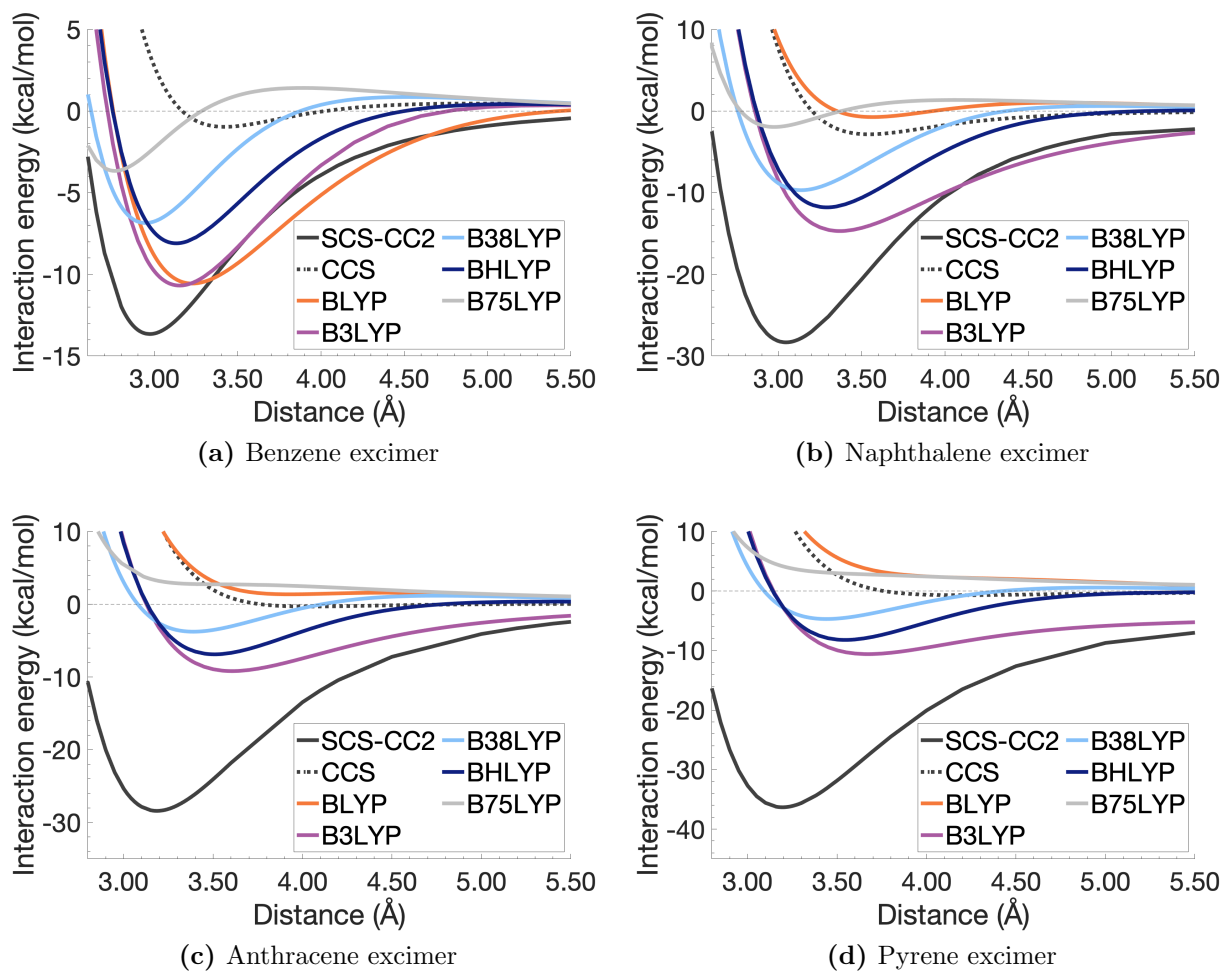

**Figure S7:** Dissociation energy curves for TD-BLYP and global hybrid variants with varied amounts of Fock exchange. CCS curves are also shown.

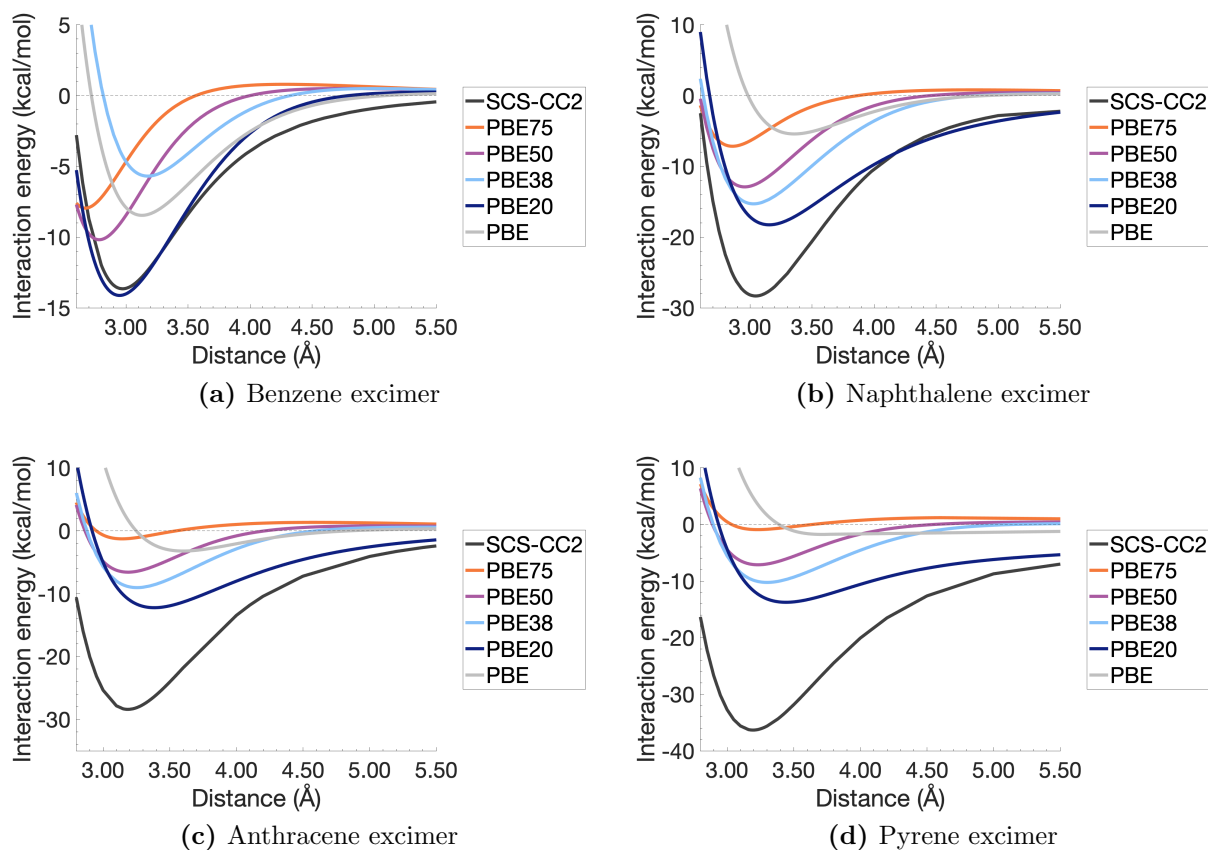

**Figure S8:** Dissociation energy curves for TD-PBE and global hybrid variants with varied amounts of Fock exchange.

## SI.4.2 DFT-D Corrected TD-DFT

### SI.4.2.1 Dissociation Curves

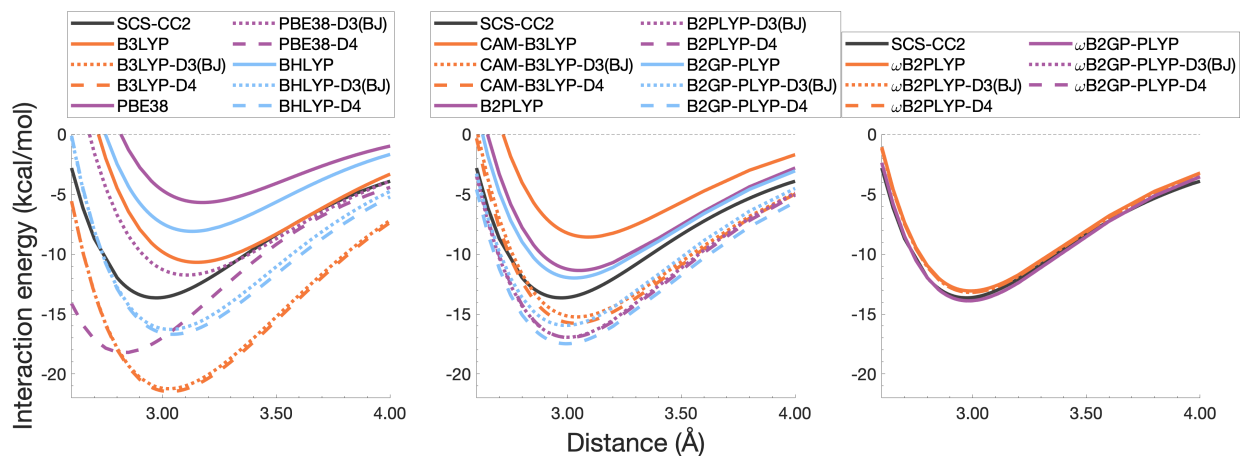

**Figure S9:** Dissociation energy curves for the benzene excimer comparing density functional approximations, with and without DFT-D type dispersion corrections, to the SCS-CC2/CBS(3,4) reference. All TD-DFT results are based on the def2-TZVP basis set.

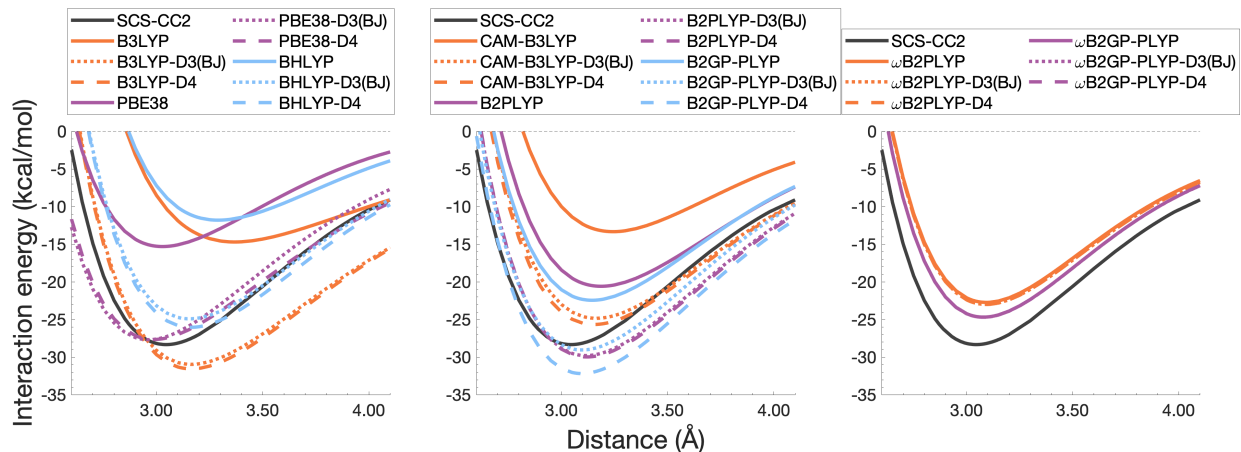

**Figure S10:** Dissociation energy curves for the naphthalene excimer comparing density functional approximations, with and without DFT-D type dispersion corrections, to the SCS-CC2/CBS(3,4) reference. All TD-DFT results are based on the def2-inter-monomerTZVP basis set.

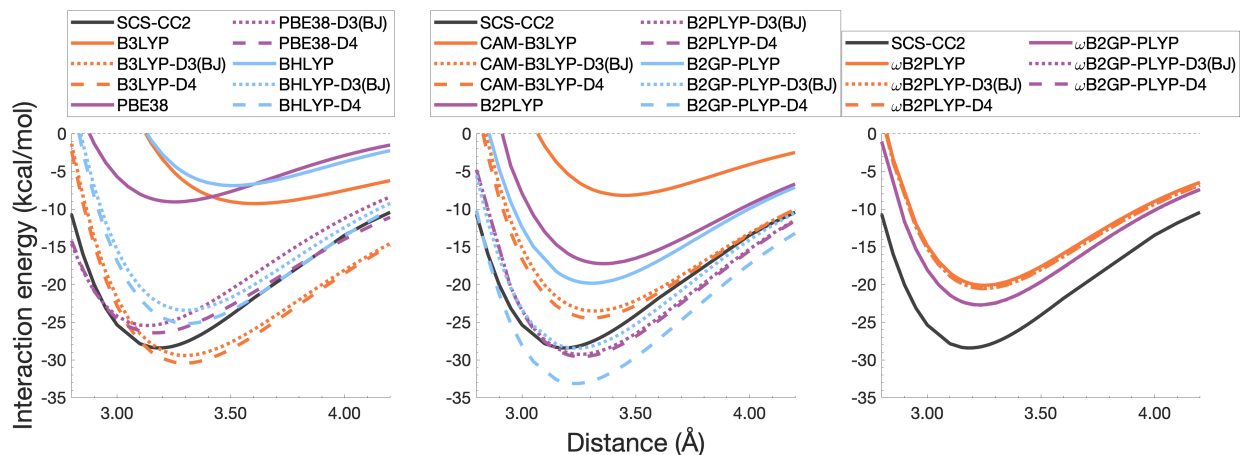

**Figure S11:** Dissociation energy curves for the anthracene excimer comparing density functional approximations, with and without DFT-D type dispersion corrections, to the SCS-CC2/CBS(3,4) reference.

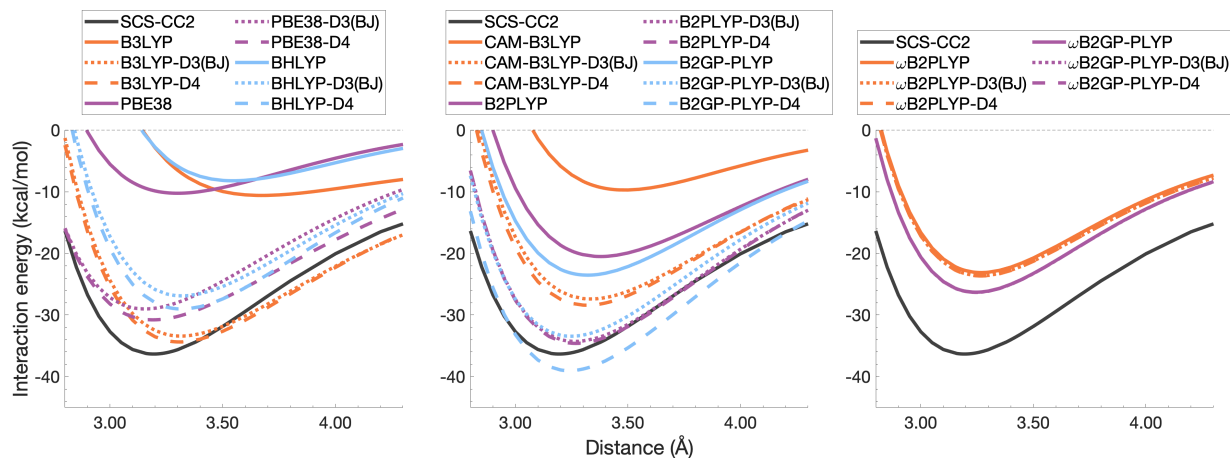

**Figure S12:** Dissociation energy curves for the pyrene excimer comparing density functional approximations, with and without DFT-D type dispersion corrections, to the SCS-CC2/CBS(3,4) reference.

#### SI.4.2.2 Unphysical Positive Regions in Mid-range of Dissociation Curves

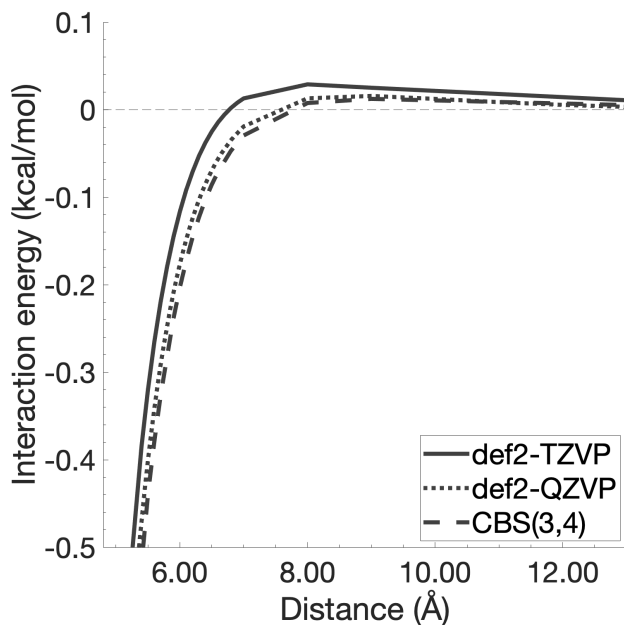

**Figure S13:** Mid-range region of SCS-CC2 dissociation curves for the benzene excimer with two truncated basis sets and their CBS(3,4) extrapolation.

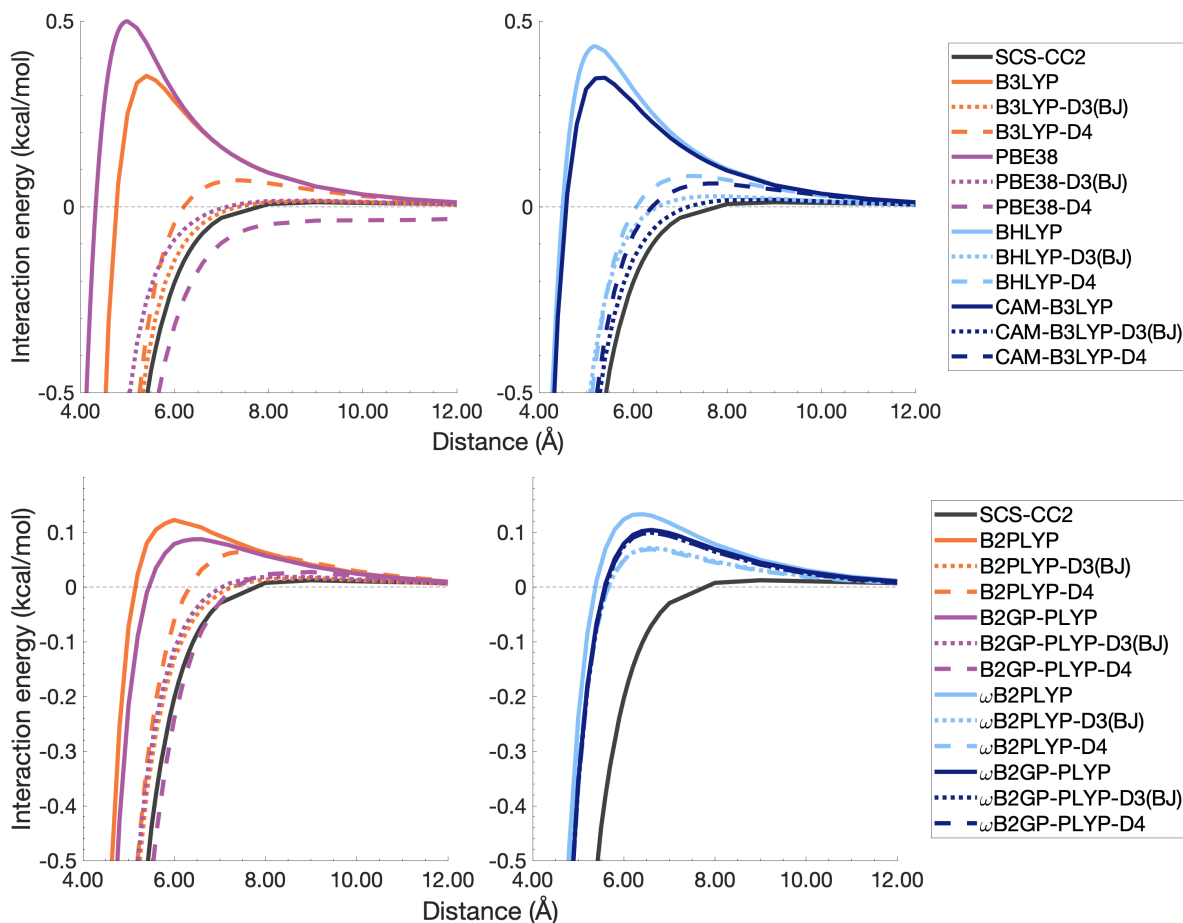

**Figure S14:** Mid-range region of the dissociation energy curves for the benzene excimer comparing density functional approximations, with and without DFT-D type dispersion corrections, to the SCS-CC2/CBS(3,4) reference.

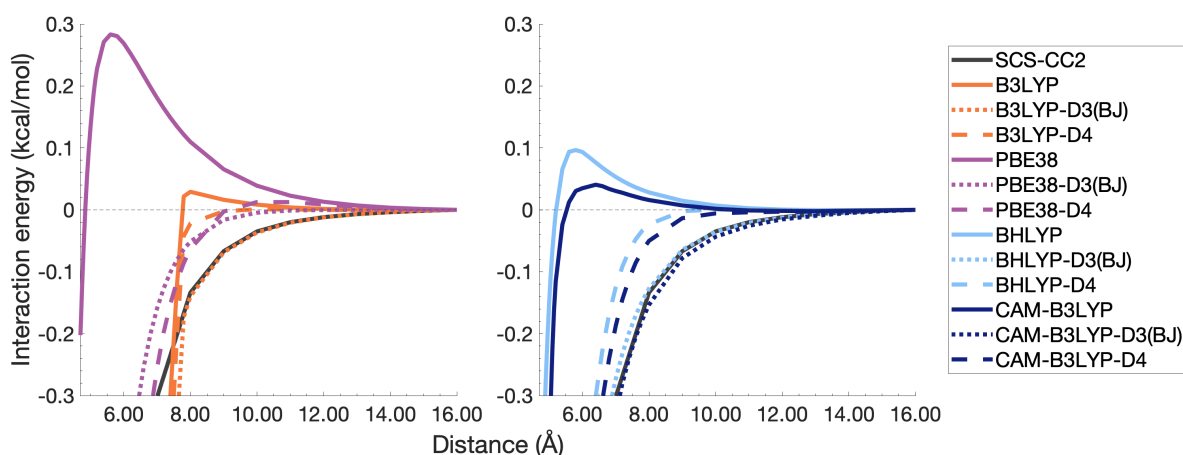

**Figure S15:** Mid-range region of the dissociation energy curves for the naphthalene excimer comparing density functional approximations, with and without DFT-D type dispersion corrections, to the SCS-CC2/def2-TZVP reference. All TD-DFT results are based on the def2-TZVP basis set. As distances beyond the binding region were not the focus of the paper, some curves may show strange shapes in the mid-range due to the small number of data points however they still showcase the identified positive region.

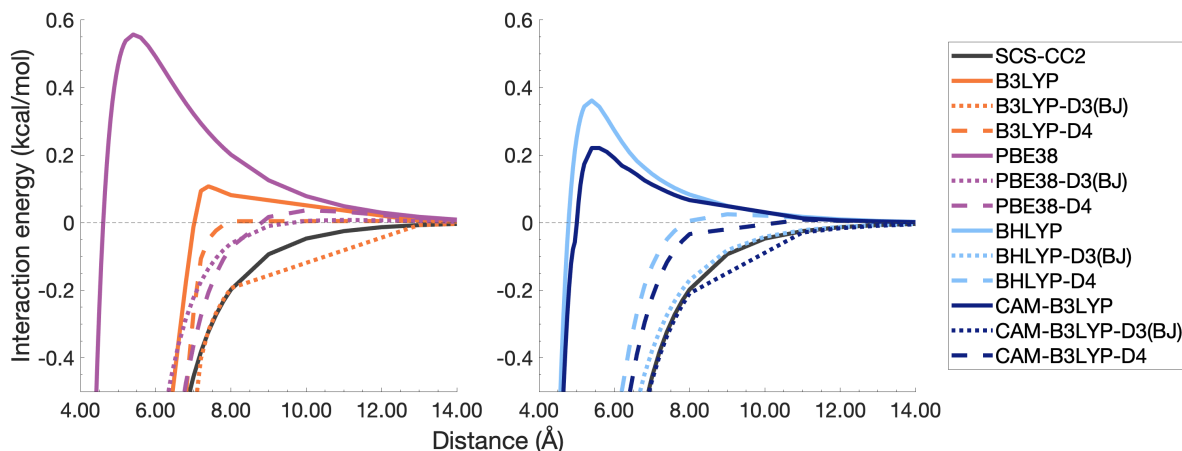

**Figure S16:** Mid-range region of the dissociation energy curves for the anthracene excimer comparing density functional approximations, with and without DFT-D type dispersion corrections, to the SCS-CC2/def2-TZVP reference. All TD-DFT results are based on the def2-TZVP basis set. As distances beyond the binding region were not the focus of the paper, some curves may show strange shapes in the mid-range due to the small number of data points however they still showcase the identified positive region.

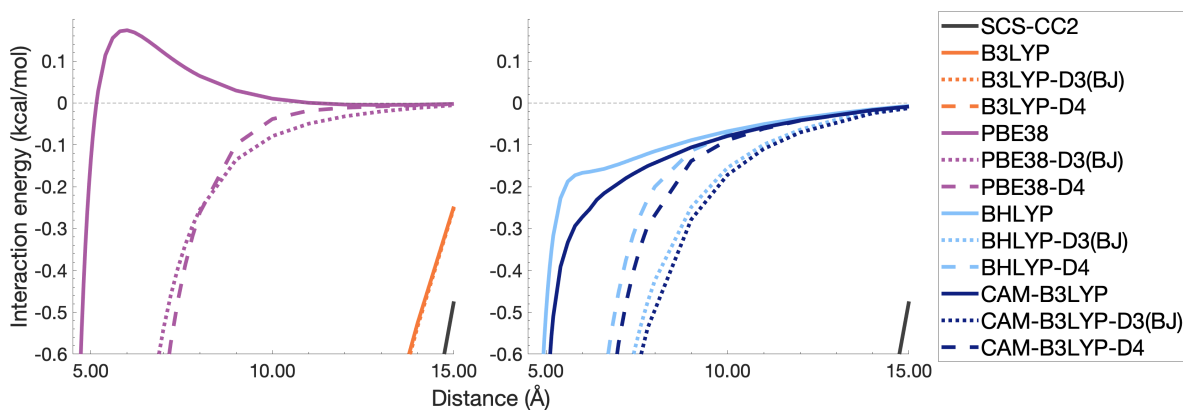

**Figure S17:** Mid-range region of the dissociation energy curves for the pyrene excimer comparing density functional approximations, with and without DFT-D type dispersion corrections, to the SCS-CC2/def2-TZVP reference. All TD-DFT results are based on the def2-TZVP basis set. As distances beyond the binding region were not the focus of the paper, some curves may show strange shapes in the mid-range due to the small number of data points however they still showcase the identified positive region.

### SI.4.3 Numerical Data For Binding Minima and Associated Percentage errors

**Table S5:** Binding of the benzene excimer described by the dissociation energy ( $D_e$ ; kcal/mol), equilibrium inter-monomer distance ( $r_e$ ; Å) and the unsigned percentage errors of each compared to that of the SCS-CC2/CBS(3,4) reference.

| Functional                 | $D_e$       |        |       | $r_e$       |        |      |
|----------------------------|-------------|--------|-------|-------------|--------|------|
|                            | Uncorrected | D3(BJ) | D4    | Uncorrected | D3(BJ) | D4   |
| B3LYP                      | 10.68       | 21.24  | 21.47 | 3.15        | 3.03   | 3.03 |
| PBE38                      | 5.69        | 11.75  | 18.20 | 3.17        | 3.11   | 2.85 |
| BHLYP                      | 8.10        | 16.28  | 16.69 | 3.13        | 3.03   | 3.05 |
| CAM-B3LYP                  | 8.58        | 15.24  | 15.77 | 3.09        | 3.04   | 3.03 |
| $\omega$ B97X <sup>a</sup> | 11.99       | -      | -     | 3.08        | -      | -    |
| B2PLYP                     | 11.36       | 16.94  | 16.96 | 3.05        | 3.00   | 3.01 |
| B2GP-PLYP                  | 11.99       | 15.95  | 17.48 | 3.03        | 2.99   | 2.99 |
| $\omega$ B2PLYP            | 13.07       | 13.20  | 13.19 | 2.99        | 2.99   | 2.99 |
| $\omega$ B2GP-PLYP         | 13.90       | 13.90  | 13.90 | 2.98        | 2.98   | 2.98 |

  

| Functional                 | Percentage error in $D_e$ |        |      | Percentage error in $r_e$ |        |      |
|----------------------------|---------------------------|--------|------|---------------------------|--------|------|
|                            | Uncorrected               | D3(BJ) | D4   | Uncorrected               | D3(BJ) | D4   |
| B3LYP                      | 21.7                      | 55.5   | 57.3 | 6.1                       | 2.0    | 2.0  |
| PBE38                      | 58.3                      | 14.0   | 33.3 | 6.7                       | 4.7    | 4.04 |
| BHLYP                      | 40.7                      | 19.3   | 22.2 | 5.4                       | 2.0    | 2.7  |
| CAM-B3LYP                  | 37.2                      | 11.7   | 15.5 | 4.0                       | 2.4    | 2.0  |
| $\omega$ B97X <sup>a</sup> | 12.2                      | -      | -    | 3.7                       | -      | -    |
| B2PLYP                     | 16.8                      | 24.1   | 24.3 | 2.7                       | 1.0    | 1.3  |
| B2GP-PLYP                  | 12.2                      | 16.8   | 28.0 | 2.0                       | 0.7    | 0.7  |
| $\omega$ B2PLYP            | 4.2                       | 3.3    | 3.4  | 0.7                       | 0.7    | 0.7  |
| $\omega$ B2GP-PLYP         | 1.8                       | 1.8    | 1.8  | 0.3                       | 0.3    | 0.3  |

<sup>a</sup>Based on the observed minimum for the curve shown in Fig. S6, which is the best-possible approximation to the true minimum given the above-mentioned difficulties with this functional. We assessed the pure  $\omega$ B97X. Its various dispersion-corrected variants all depend on slightly different underlying XC expressions,<sup>S1-S6</sup> which is why dispersion-corrected results are not provided.

**Table S6:** Binding of the naphthalene described by the dissociation energy ( $D_e$ ; kcal/mol), equilibrium inter-monomer distance ( $r_e$ ; Å) and the unsigned percentage errors of each compared to that of the SCS-CC2/CBS(3,4) reference.

| Functional                 | $D_e$                     |        |       | $r_e$                     |        |      |
|----------------------------|---------------------------|--------|-------|---------------------------|--------|------|
|                            | Uncorrected               | D3(BJ) | D4    | Uncorrected               | D3(BJ) | D4   |
| B3LYP                      | 14.69                     | 30.94  | 31.54 | 3.37                      | 3.16   | 3.16 |
| PBE38                      | 15.30                     | 27.67  | 27.64 | 3.03                      | 2.96   | 2.99 |
| BHLYP                      | 11.79                     | 24.90  | 26.03 | 3.29                      | 3.16   | 3.16 |
| CAM-B3LYP                  | 13.32                     | 24.83  | 25.65 | 3.24                      | 3.16   | 3.15 |
| $\omega$ B97X <sup>a</sup> | 18.95                     | -      | -     | 3.24                      | -      | -    |
| B2PLYP                     | 20.58                     | 29.78  | 29.96 | 3.19                      | 3.11   | 3.12 |
| B2GP-PLYP                  | 22.43                     | 29.03  | 32.17 | 3.14                      | 3.10   | 3.10 |
| $\omega$ B2PLYP            | 22.72                     | 22.98  | 22.99 | 3.09                      | 3.09   | 3.09 |
| $\omega$ B2GP-PLYP         | 24.67                     | 24.68  | 24.68 | 3.07                      | 3.07   | 3.07 |
| Functional                 | Percentage error in $D_e$ |        |       | Percentage error in $r_e$ |        |      |
|                            | Uncorrected               | D3(BJ) | D4    | Uncorrected               | D3(BJ) | D4   |
| B3LYP                      | 48.1                      | 9.3    | 11.4  | 10.9                      | 3.9    | 3.9  |
| PBE38                      | 46.0                      | 2.3    | 2.4   | 0.3                       | 2.6    | 1.6  |
| BHLYP                      | 58.4                      | 12.1   | 8.1   | 8.2                       | 3.9    | 3.9  |
| CAM-B3LYP                  | 53.0                      | 12.3   | 9.4   | 6.6                       | 3.9    | 3.6  |
| $\omega$ B97X <sup>a</sup> | 33.1                      | -      | -     | 6.6                       | -      | -    |
| B2PLYP                     | 27.3                      | 5.2    | 5.8   | 4.9                       | 2.3    | 2.6  |
| B2GP-PLYP                  | 20.8                      | 2.5    | 13.6  | 3.3                       | 2.0    | 2.0  |
| $\omega$ B2PLYP            | 19.8                      | 18.8   | 18.8  | 1.6                       | 1.6    | 1.6  |
| $\omega$ B2GP-PLYP         | 12.9                      | 12.9   | 12.9  | 1.0                       | 1.0    | 1.0  |

<sup>a</sup>Based on the observed minimum for the curve shown in Fig. S6, which is the best-possible approximation to the true minimum given the above-mentioned difficulties with this functional. We assessed the pure  $\omega$ B97X. Its various dispersion-corrected variants all depend on slightly different underlying XC expressions,<sup>S1-S6</sup> which is why dispersion-corrected results are not provided.

**Table S7:** Binding of the anthracene excimer described by the dissociation energy ( $D_e$ ; kcal/mol), equilibrium inter-monomer distance ( $r_e$ ; Å) and the unsigned percentage errors of each compared to that of the SCS-CC2/CBS(3,4) reference.

| Functional                 | $D_e$                     |        |       | $r_e$                     |        |      |
|----------------------------|---------------------------|--------|-------|---------------------------|--------|------|
|                            | Uncorrected               | D3(BJ) | D4    | Uncorrected               | D3(BJ) | D4   |
| B3LYP                      | 9.18                      | 29.59  | 30.41 | 3.61                      | 3.30   | 3.30 |
| PBE38                      | 9.04                      | 25.43  | 26.40 | 3.26                      | 3.13   | 3.17 |
| BHLYP                      | 6.88                      | 23.40  | 25.17 | 3.51                      | 3.31   | 3.31 |
| CAM-B3LYP                  | 8.18                      | 23.50  | 24.44 | 3.45                      | 3.32   | 3.30 |
| $\omega$ B97X <sup>a</sup> | 16.01                     | -      | -     | 3.36                      | -      | -    |
| B2PLYP                     | 17.23                     | 29.24  | 29.55 | 3.36                      | 3.25   | 3.26 |
| B2GP-PLYP                  | 19.82                     | 28.44  | 33.12 | 3.31                      | 3.24   | 3.23 |
| $\omega$ B2PLYP            | 20.10                     | 20.53  | 20.54 | 3.25                      | 3.25   | 3.25 |
| $\omega$ B2GP-PLYP         | 22.70                     | 22.72  | 22.72 | 3.23                      | 3.23   | 3.23 |
| Functional                 | Percentage error in $D_e$ |        |       | Percentage error in $r_e$ |        |      |
|                            | Uncorrected               | D3(BJ) | D4    | Uncorrected               | D3(BJ) | D4   |
| B3LYP                      | 67.7                      | 4.2    | 7.1   | 13.5                      | 3.8    | 3.8  |
| PBE38                      | 68.2                      | 10.5   | 7.1   | 2.5                       | 1.6    | 0.3  |
| BHLYP                      | 75.8                      | 17.6   | 11.4  | 10.4                      | 4.1    | 4.1  |
| CAM-B3LYP                  | 71.2                      | 17.2   | 14.0  | 8.5                       | 4.4    | 3.8  |
| $\omega$ B97X <sup>a</sup> | 43.6                      | -      | -     | 5.7                       | -      | -    |
| B2PLYP                     | 39.3                      | 3.0    | 4.1   | 5.7                       | 2.2    | 2.5  |
| B2GP-PLYP                  | 30.2                      | 0.1    | 16.6  | 4.1                       | 1.9    | 1.6  |
| $\omega$ B2PLYP            | 29.2                      | 27.7   | 27.7  | 2.2                       | 2.2    | 2.2  |
| $\omega$ B2GP-PLYP         | 20.1                      | 20.0   | 20.0  | 1.6                       | 1.6    | 1.6  |

<sup>a</sup>Based on the observed minimum for the curve shown in Fig. S6, which is the best-possible approximation to the true minimum given the above-mentioned difficulties with this functional. We assessed the pure  $\omega$ B97X. Its various dispersion-corrected variants all depend on slightly different underlying XC expressions,<sup>S1-S6</sup> which is why dispersion-corrected results are not provided.

**Table S8:** Binding of the pyrene excimer described by the dissociation energy ( $D_e$ ; kcal/mol), equilibrium inter-monomer distance ( $r_e$ ; Å) and the unsigned percentage errors of each compared to that of the SCS-CC2/CBS(3,4) reference.

| Functional                 | $D_e$                     |        |       | $r_e$                     |        |      |
|----------------------------|---------------------------|--------|-------|---------------------------|--------|------|
|                            | Uncorrected               | D3(BJ) | D4    | Uncorrected               | D3(BJ) | D4   |
| B3LYP                      | 10.60                     | 33.41  | 34.37 | 3.67                      | 3.31   | 3.31 |
| PBE38                      | 10.24                     | 29.01  | 30.78 | 3.30                      | 3.15   | 3.19 |
| BHLYP                      | 8.22                      | 26.89  | 29.02 | 3.54                      | 3.32   | 3.32 |
| CAM-B3LYP                  | 9.71                      | 27.39  | 28.41 | 3.50                      | 3.33   | 3.32 |
| $\omega$ B97X <sup>a</sup> | 17.97                     | -      | -     | 3.37                      | -      | -    |
| B2PLYP                     | 20.51                     | 34.28  | 34.60 | 3.38                      | 3.26   | 3.27 |
| B2GP-PLYP                  | 23.53                     | 33.44  | 39.03 | 3.32                      | 3.25   | 3.24 |
| $\omega$ B2PLYP            | 23.11                     | 23.63  | 23.66 | 3.27                      | 3.27   | 3.27 |
| $\omega$ B2GP-PLYP         | 26.29                     | 26.32  | 26.32 | 3.25                      | 3.25   | 3.25 |
| Functional                 | Percentage error in $D_e$ |        |       | Percentage error in $r_e$ |        |      |
|                            | Uncorrected               | D3(BJ) | D4    | Uncorrected               | D3(BJ) | D4   |
| B3LYP                      | 70.8                      | 8.0    | 5.4   | 15.0                      | 3.8    | 3.8  |
| PBE38                      | 71.8                      | 20.1   | 15.3  | 3.4                       | 1.3    | 0.0  |
| BHLYP                      | 77.4                      | 26.0   | 20.1  | 11.0                      | 4.1    | 4.1  |
| CAM-B3LYP                  | 73.3                      | 24.6   | 21.8  | 9.7                       | 4.4    | 4.1  |
| $\omega$ B97X <sup>a</sup> | 50.5                      | -      | -     | 5.6                       | -      | -    |
| B2PLYP                     | 43.6                      | 5.6    | 4.8   | 6.0                       | 2.2    | 2.5  |
| B2GP-PLYP                  | 35.2                      | 7.9    | 7.4   | 4.1                       | 1.9    | 1.6  |
| $\omega$ B2PLYP            | 36.4                      | 35.0   | 34.9  | 2.5                       | 2.5    | 2.5  |
| $\omega$ B2GP-PLYP         | 27.6                      | 27.5   | 27.5  | 1.9                       | 1.9    | 1.9  |

<sup>a</sup>Based on the observed minimum for the curve shown in Fig. S6, which is the best-possible approximation to the true minimum given the above-mentioned difficulties with this functional. We assessed the pure  $\omega$ B97X. Its various dispersion-corrected variants all depend on slightly different underlying XC expressions,<sup>S1-S6</sup> which is why dispersion-corrected results are not provided.

## SI.4.4 Mean Absolute Deviations

**Table S9:** Mean absolute deviations (MADs) for the dissociation energy ( $D_e$ ; kcal/mol) and equilibrium distance ( $r_e$ ; Å) characterising the description of excimer binding by the method relative to SCS-CC2/CBS(3,4) reference.

| Functional                 | $D_e$ MADs  |            |        | $r_e$ MADs  |            |        |
|----------------------------|-------------|------------|--------|-------------|------------|--------|
|                            | Uncorrected | DFT-D3(BJ) | DFT-D4 | Uncorrected | DFT-D3(BJ) | DFT-D4 |
| B3LYP                      | 15.38       | 3.58       | 3.75   | 0.36        | 0.11       | 0.11   |
| PBE38                      | 16.61       | 3.21       | 3.20   | 0.10        | 0.08       | 0.05   |
| BHLYP                      | 17.93       | 5.12       | 3.97   | 0.27        | 0.11       | 0.12   |
| CAM-B3LYP                  | 16.73       | 4.73       | 4.17   | 0.23        | 0.12       | 0.11   |
| $\omega$ B97X <sup>a</sup> | 10.45       | -          | -      | 0.17        | -          | -      |
| B2PLYP                     | 9.26        | 1.91       | 1.96   | 0.15        | 0.06       | 0.07   |
| B2GP-PLYP                  | 7.23        | 1.48       | 3.77   | 0.11        | 0.05       | 0.05   |
| $\omega$ B2PLYP            | 6.92        | 6.59       | 6.58   | 0.06        | 0.06       | 0.06   |
| $\omega$ B2GP-PLYP         | 4.91        | 4.90       | 4.90   | 0.04        | 0.04       | 0.04   |

<sup>a</sup>Based on the observed minima for the curves shown in Fig. S6, which are the best-possible approximations to the true minima given the above-mentioned difficulties with this functional. We assessed the pure  $\omega$ B97X. Its various dispersion-corrected variants all depend on slightly different underlying XC expressions,<sup>S1-S6</sup> which is why dispersion-corrected results are not provided.

# References

- (S1) Chai, J.-D.; Head-Gordon, M. *J. Chem. Phys.* **2008**, *128*, 084106.
- (S2) Chai, J.-D.; Head-Gordon, M. *Phys. Chem. Chem. Phys.* **2008**, *10*, 6615–6620.
- (S3) Lin, Y.-S.; Li, G.-D.; Mao, S.-P.; Chai, J.-D. *J. Chem. Theory Comput. Chem.* **2013**, *9*, 263–272.
- (S4) Mardirossian, N.; Head-Gordon, M. *Phys. Chem. Chem. Phys.* **2014**, *16*, 9904–9924.
- (S5) Najibi, A.; Goerigk, L. *J. Chem. Theory Comput.* **2018**, *14*, 5725–5738.
- (S6) Najibi, A.; Goerigk, L. *J. Comput. Chem.* **2020**, *41*, 2562–2572.
